# Supplementary material
Source: MDPI journal article supplement (https://www.mdpi.com/2071-1050/12/3/840)
Supplement: s1 [file s1]

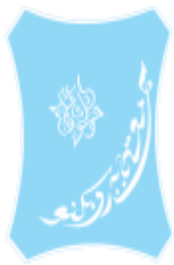

## DEPARTMENT OF GEOGRAPHY

### BAYERO UNIVERSITY KANO

#### RESEARCH QUESTIONNAIRE

#### INTRODUCTION

Dear respondent, we are carrying out a research on “Adoption Of Solar Energy in Kano Metropolis”. Kindly read the questions and select appropriate option, and for questions that do not have options, you are expected to write in your own words. You should be rest assured that the information you provide will only be used for academic research and will be treated as confidential. Thanks in anticipation of your cooperation.

#### SECTION A: SOCIO-ECONOMIC INFORMATION

- 1) Location: \_\_\_\_\_
- 2) Gender of Household Head: (A) Male { } (B) Female { }
- 3) Age of Household Head: \_\_\_\_\_
- 4) Number of People in the House: \_\_\_\_\_
- 5) Level of Education of Household Head (A) Primary [ ] (B) Secondary [ ] (C) Tertiary [ ] (D) None [ ]
- 6) Occupation (A) Civil Servant [ ] (B) Business [ ] (C) Private Sector [ ] (D) Retired [ ] (E) Unemployed (F) Others [ ]
- 7) Income Type: (A) Regular { } (B) Non-Regular { }
- 8) Income per month (A) Below 18,000 { } (B) 18,000- 58,000 { } (C) 59,000- 99,000 { } (D) 100,000- 140,000 { } (E) 141,000- 180,000 { } (F) Above 180,000 { }

#### Section B: Planning Aspect

- 9) Type of roofing (A) Gable { } (B) Hip { } (C) Flat { }
- 10) Does shade from neighbouring building affects solar radiation to your house? (A) Yes { } (B) No { }
- 11) House Type (A) Bungalow [ ] (B) Duplex [ ] (C) Block of Flats [ ] (D) Traditional [ ]
- 12) What do you use Solar Energy for? (A) Lighting { } (B) Charging Appliances { } (C) Cooling and heating { } (D) Pumping { } (E) Television and Radio { }
- 13) When do you use the Solar Energy? (A) Morning { } (B) Afternoon { } (C) Night { }

#### Section C: Technical Aspect

- 14) How long do you use it daily? (A) 1-6 hours { } (B) 7-12 hours { } (C) 13-18 hours { } (D) 19-24 hours { }
- 15) Since when did you install your solar energy? (A) 1 year { } (B) 2 years { } (C) 3 years { } (D) 4 years { } (E) 5 years and above { }
- 16) What technical problem have you encountered since installation? (A) Poor charging { }

- (B) Reduced duration { } (C) Inverter malfunction (D) solar panel problem { }  
(E) None { }
- 17) Have you replaced your batteries? (A) Yes { } (B) No { }
- 18) If yes, how often? (A) At least once a year { } (B) At least once in two years { }  
(C) At least once since installation { } (D) None { }
- 19) What measures have you taken to address inefficient usage (A) Timed usage { } (B) Sensitization { } (C) System upgrade { } (D) Light off { }
- 20) Perception of your appliances energy efficiency (A) Poor (B) Moderate (C) Good { }
- 21) Did you change appliances before installing solar? (A) Yes { } (B) No { }
- 22) How will you rate the performance of your solar energy system? (A) Satisfactory { } (B) Unsatisfactory { }
- 23) Availability of services such as repairs (A) Readily Available { } (B) Unavailable { }
- 24) reliability of repairs (A) Reliable { } (B) Unreliable { }
